## A review of the postoperative lymphatic leakage

Shulan Lv<sup>1,\*</sup>, Qing Wang<sup>1,\*</sup>, Wanqiu Zhao<sup>2,\*</sup>, Lu Han<sup>1</sup>, Qi Wang<sup>1</sup>, Nasra Batchu<sup>1</sup>, Qurat Ulain<sup>1</sup>, Junkai Zou<sup>1</sup>, Chao Sun<sup>1</sup>, Jiang Du<sup>1</sup>, Qing Song<sup>1,3,4</sup> and Qiling Li<sup>1,4</sup>

<sup>1</sup>Department of Obstetrics and Gynecology, First Affiliated Hospital, Xi'an Jiaotong University, Xi'an, Shaanxi, China

<sup>2</sup>Northwest Women's and Children's Hospital, Xi'an, Shaanxi, China

<sup>3</sup>Cardiovascular Research Institute, Morehouse School of Medicine, Atlanta, GA, USA

<sup>4</sup>Center of Big Data and Bioinformatics, First Affiliated Hospital, Xi'an Jiaotong University, Xi'an, Shaanxi, China

\*Co first authors

**Correspondence to:** Qiling Li, **email:** liqiling@mail.xjtu.edu.cn

**Keywords:** *lymphatic leakage, postoperation, complication, chylous ascites, chylothorax*

**Received:** January 04, 2017

**Accepted:** April 11, 2017

**Published:** April 20, 2017

Copyright: Lv et al. This is an open-access article distributed under the terms of the Creative Commons Attribution License 3.0 (CC BY 3.0), which permits unrestricted use, distribution, and reproduction in any medium, provided the original author and source are credited.

### ABSTRACT

**Lymphatic complications are rare, but well-known phenomena, and have been described by many researchers. However, many diagnoses of lymphatic complications are found confusing due to different definition. A literature search in Pubmed was performed for studies postoperative lymphatic complications. These complications divided into two parts: lymphatic leakage and lymphatic stasis. This review is about lymphatic leakage, especially, postoperative lymphatic leakage due to the injury of lymphatic channels in surgical procedures. According to polytrophic consequences, many types of postoperative lymphatic leakage have been presented, including lymph ascites, lymphocele, lymphorrhea, lymphatic fistula, chylous ascites, chylothorax, chyloretroperitoneum and chylorrhea. In this review, we focus on the definition, incidence and treatment about most of these forms of lymphatic complications to depict a comprehensive view of postoperative lymphatic leakage. We hold the idea that the method of treatment should be individual and personal according to manifestation and tolerance of patient. Meanwhile, conservative treatment is suitable and should be considered first.**

### BACKGROUND

Many surgical procedures may injure lymphatic channels unexpectedly such as lymph node dissections, transplantations and vessels reconstructions, and will lead to iatrogenic lymphatic leakage.

### RESULTS AND DISCUSSION

#### Lymphatic circulation

Lymphatic circulation can drain proteins and excess interstitial fluid back to the systemic circulation, regulate the immune responses by both cellular and humoral mechanisms, and absorb lipids from the intestine [1]. A schema chart (Figure 1) demonstrates lymphatic circulation clearly. In the physical circumstances, low amounts of fluid, filter into the interstitial tissues continuously, and are collected by blind-ended lymphatic capillaries back into the blood stream. This fluid goes

into the cisterna chyli and thoracic duct and ends at the subclavian veins [2].

Cisterna chyli, as a saccular aneurysm, is the termination of the retroperitoneal lymphatic pathways and the beginning of the thoracic duct. According to the anatomic datum, half of the cases don't have cisterna chyli, as it is replaced by a variable lymphatic plexus [3]. For thoracic duct, it exists in paired form, right and left thoracic ducts during the development of the embryo, but the only certain portion will develop into an adult thoracic duct. So in some cases, thoracic duct circulates into right and left branches. Right branch joins the right subclavian or internal jugular vein [2]. A radiological study shows that the incidence of a visible, right-sided duct is 4% [4]. Another appearance type is the single right-sided thoracic duct emptying into the right internal jugular vein through three separate terminal branches [5].

Fatty acids less than 10 carbon atoms will be transported into the portal venous system directly, while fatty acids greater than 10 carbon atoms will be absorbed

by lacteals and lymphatic capillaries of small intestine, forming chylomicrons [6, 7]. The mixture of lymph and chylomicrons is called chyle [8] which is milky white tint [9], odorless [10] and strongly bacteriostatic due to the large number of lymphocytes. It is estimated that 3 to 5 Liter per day or 60 to 190 ml per hour of lymph fluid passes through the thoracic duct during the absorption phase of digestion [6]. 50% to 90% of lymph fluid in cisterna chyli and thoracic duct comes from intestines and liver. Fasting before operation may decrease lymphatic flow less than 1 ml/min dramatically, while it may increase to more than 200 ml/min after a normal diet recovers [11, 12]. The amount of the lymphatic flow may increase and the size of lymphatic ducts may be magnified under the following circumstances of hypertension and cardiac diseases, particularly mitral valve dysfunction and left ventricular aneurysm [3].

### Definition of lymphatic channel leakage

During operation, the trauma of lymphatic system results in the postoperative leakage of lymphatic fluid. Many kinds of postoperative lymphatic leakage have been reported, which includes lymphatic ascites (lymph

ascites) [13–15], lymphocele [16, 17], lymphorrhea [7, 18], lymphatic fistula [19–22], and some special forms of lymphatic leakage: chylous ascites (chyloperitoneum) [23–26], chyloretroperitoneum [30, 31], chylothorax [32, 33]. In order to describe them readily, we categorize them into five types owing to different consequences and characteristics (Figure 2 and Figure 3).

### Lymphatic ascites (Lymph ascites)

Lymphatic ascites is the accumulation of straw-colored or clear lymph fluid in the peritoneal cavity with a similar composition of creatinine and blood urea nitrogen (BUN) to their serum [13]. Biochemical tests show a low level of triglyceride even after a high fat diet [14, 15]. Most of lymphadenectomies lead to the leakage of lymphatic vessel, but they usually stop spontaneously without the consequence of symptomatic ascites. About 9 of 110 patients (8.2%) were identified with lymphatic ascites by routine weekly sonograms after surgeries. However, only 5 of these 9 patients were symptomatic and required interventions eventually [8]. Since pelvic and para-aortic lymphadenectomy being performed during genito-urinary malignancies procedures

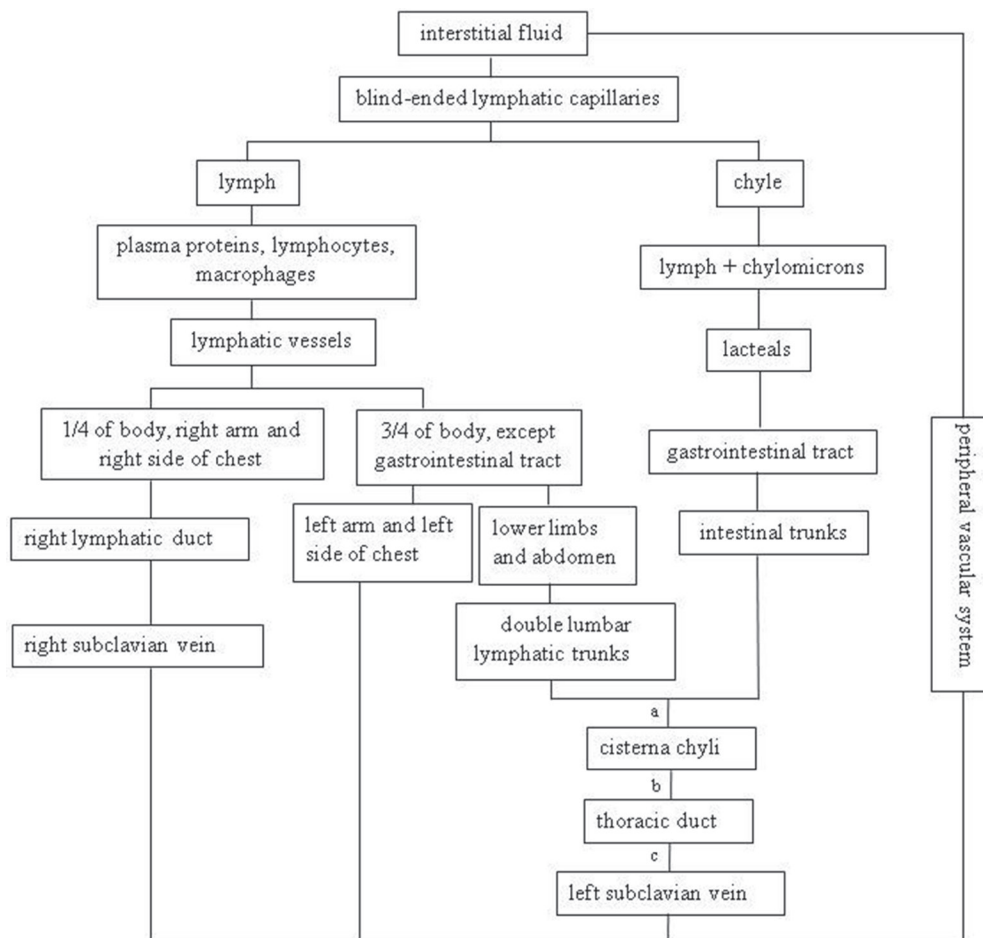

**Figure 1: Lymphatic circulation.** a at the level of the first or second lumbar vertebra; b traverse the aortic hiatus into the right posterior mediastinum; c. at the level of the 4th thoracic vertebra.

[34], lymphatic ascites with the low incidence of 2.7% to 4.5% [8, 34] seemingly have a special favorite in surgeries of gynecologic cancers such as endometrial and cervical cancers [15] (Supplementary Table 1 and Supplementary Table 2). There is another lymphatic ascites after appendectomy reported [14], which is really rare.

### Lymphocele (lymphocyst)

Lymphocele, same as lymphocyst [16, 17], is a cystic filled by clear lymph fluid with no inflammatory or granulomatous reaction at the leakage site. There may develop a swelling pocket cavity under healing wound

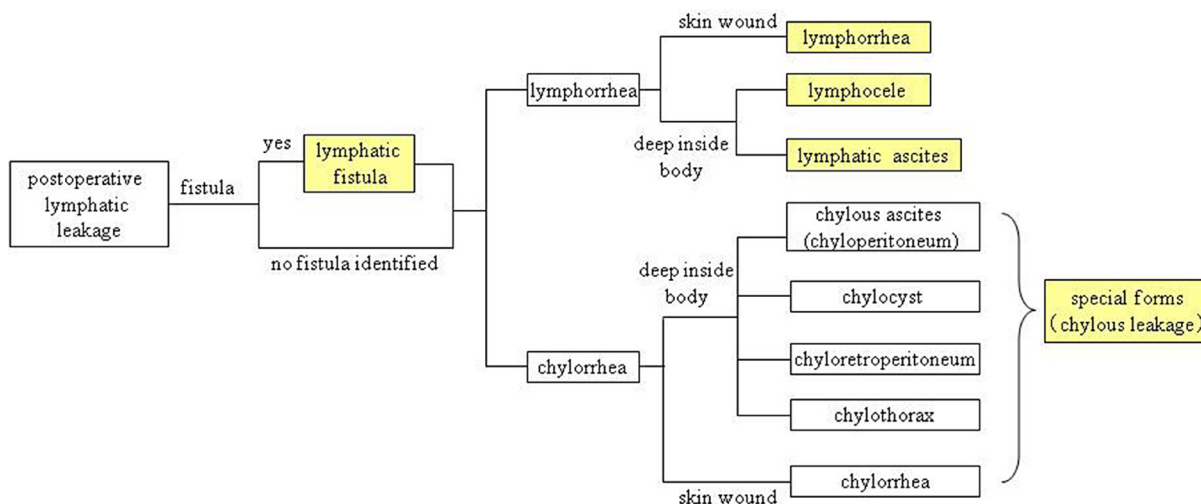

Figure 2: Classification of postoperative lymphatic leakage.

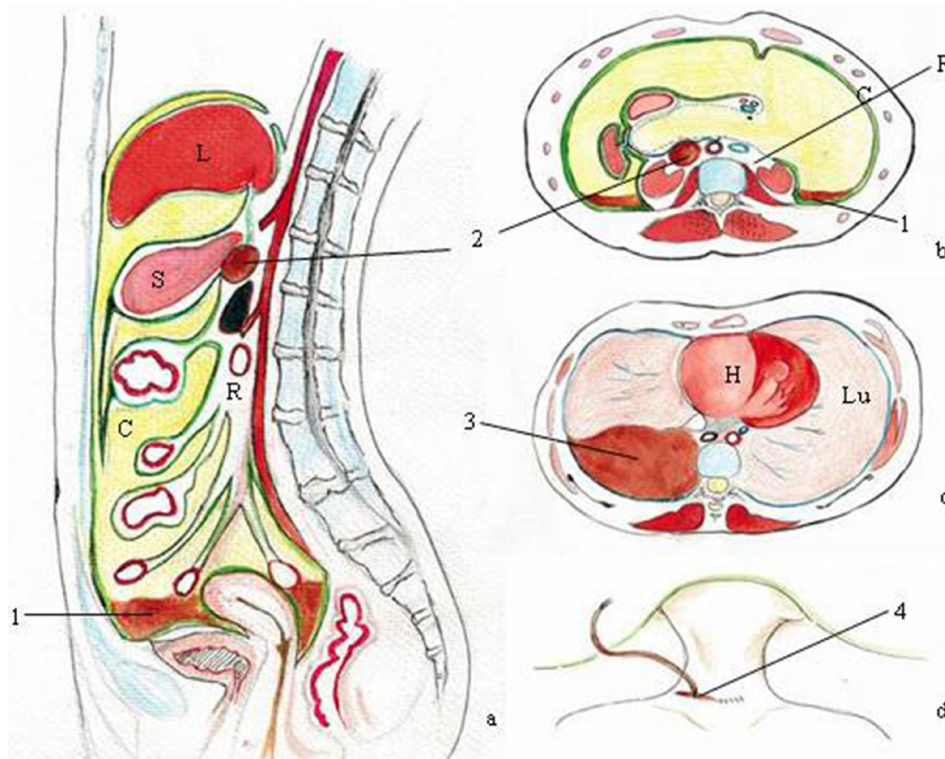

Figure 3: Pictured here is the postoperative lymphatic leakage. (a and b) peritoneum anatomy (cross section and longitudinal section); c: thorax anatomy; d: sketch of cervical incision; L: liver; S: stomach; C: peritoneal cavity; R: retroperitoneal space; H: heart; Lu: lung; 1: the lymphatic ascites or chylous ascites; 2:lymphocele (it can also exist in peritoneal cavity or in other soft tissue not only retroperitoneal space); 3:the chylothorax; 4: the lymphorrhoea or the chylorrhoea; Lymphatic fistula and chyloretroperitoneum are not showed in this picture.

in soft tissue with or without septa [35–37]. Lymphocele often occurs within 3 ~ 8 weeks or 1 year occasionally after surgeries [38]. Because of self-limiting, most of postoperative lymphocele is usually asymptomatic, undiagnosed and self-healing without any treatments [38, 39]. Only 4% – 7% of postoperative lymphocele is symptomatic [16] due to self-absorption disorder. The mean diameter of a symptomatic lymphocele is usually more than 5 cm [16]. And it will require some interventions [38] when pain, infection, lymphorrhea on the fresh wound or compression of vital structures occurs [17].

Lymphocele occurs in many surgeries on various parts of body, including pelvis [40], mediastinum, axilla, neck, aorta and peripheral vasculature [41]. Pelvic lymphocele is usually related to pelvic lymphadenectomy and renal transplantation [17]. 0.6% to 22% of kidney transplantations at the lower or upper medial region develop postoperative lymphoceles [38, 42]. Inguinal lymphocele is also a well-known complication of inguinal lymph nodes dissection (ILND) for penile and vulvar cancer, with an incidence ranging from 5% to 87% [43, 44].

As the influence factors, body mass index (BMI) and the number of resected pelvic lymph nodes reach the statistical significance to lymphocele incidence [38, 45]. Gery et al. [37] observed 163 patients with laparoscopic extra-peritoneal para-aortic lymphadenectomies. As for the lymphocele incidence, there is no significant difference found ( $p = 0.80$ ) whether using ultrasonic advanced energy instruments or not. The incidence of lymphocele is lower without postoperative radiotherapy ( $p = 0.01$ ), but no significant difference shows between pre/postoperative chemotherapies ( $p = 0.10$ ) [38]. Symptomatic lymphoceles are more frequent after open surgeries compared with laparoscopies [16]. The risk of lymphocele is also higher in lower lumbar surgeries because of a higher density of lymphatic channels existence [46].

## Lymphorrhea

Lymphorrhea was once used as replacement of lymph ascites, chylous ascites, chylothorax or the lymph fluid exudation, which really confused us [16, 47]. Actually lymphorrhea is lymphatic exudation on the wound after slight trauma of lymphatic vessels. Lymphorrhea after the trauma, deep inside body, will heal itself in most of the situations or form into lymph ascites, lymphocele [7, 18] occasionally. Ilzecki et al. describe lymphorrhea as light color fluid profusely soaked dressing [48]. Ghezzi F et al. [16] ever defined lymphorrhea as the ultrasonographic finding of free lymphatic fluid in the peritoneum. This is not accurate since we cannot find the difference between lymph ascites or chylous ascites. Lymphorrhea may occur after the vascular reconstructive surgeries, such as a reconstructive procedure of the superficial femoral artery [48]. And 10% – 16% of cases after vein graft harvesting for infrainguinal arterial bypass suffer from lymphorrhea [13].

## Lymphatic fistula

Lymphatic fistula includes lymphocutaneous fistula [49–51] and lymphoperitoneal fistula [52, 53]. Lymphocutaneous fistula prompts the formation of lymphorrhea, chylorrhea and other associated lymphatic leakage. Lymphoperitoneal fistula is one of reasons of lymphatic ascites and lymphocele. There should be an objective existence of fistula identified by lymphangiography or lymphoscintigraphy. Meanwhile, a pilot study and a subsequent clinical trial show that the lymphatic fistula form after 48 h of continuing leakage [54]. Lymphatic fistula can form due to the increased pressure in lymph vessels or the reflux of capillary lymph vessels from the lymphatic channel leakage, which can dilate the capillary lymph vessels and destroy the normal structure of skin or tissue [50].

Lymphatic fistula is common after inguinal or axillary lymph nodes dissection in different urologic, gynecologic, dermatologic cancers [55] and arterial reconstruction [51]. The incidence of lymphatic fistula in thyroid surgery is 0.5% to 2.5%. And it will be a little much higher with lymph nodes dissection for thyroid cancer [22].

Besides the types of postoperative lymphatic leakage mentioned above, there are some special forms of lymphatic leakage such as chylous ascites (chyloperitoneum), chyloretroperitoneum, chylothorax and chylorrhea. This classification depends on the following reasons: ① Lymph fluid is clear or straw-colored ascites similar to the serum of patients [13]. Chyle, the mixture of lymph fluid and chylomicrons [8], is milky white tint [9], odorless [10] and rich in triglycerides. ② The lymph fluid and chyle distribute to different lymphatic channel vessels [8], that means they may reminder doctors of the different preliminary locations of the lymphatic channel leakages. ③ Since rich content of triglycerides, the loss of chyle is more likely to induce the nutritional deficiency, immunologic dysfunction or some other complications [34]. ④ The treatments using medium-chain triglyceride diet, somatostatin analogue and so on are thought to be more effective to chylous leakage than lymph leakage [34, 56]. ⑤ Compared with postoperative lymph fluid exudation, the drainage of milky white chyle will increase the fear, anxiety and other unhealthy emotion of patients and reduce the trust in their doctors according to clinical observation. All in all, the special types of postoperative lymphatic leakage are different to the other types of lymphatic leakage.

## Chylous ascites (chyloperitoneum)

Postoperative chylous ascites, or chyloperitoneum, is the pathologic accumulation of chyle in the peritoneal cavity [52, 57–62]. The leaking fluid is rich in triglycerides (>200 mg/dl) [23–26], odorless, alkaline and sterile. The

symptoms of chylous ascites usually occur at average 4.1 days after surgery due to the dietary intake at post-operation day (POD) 2. It usually forms as a result of surgical trauma of the thoracic duct, cisterna chyli or their major tributaries [34, 59].

There are three mechanisms in the formation of chyloperitoneum, including ① direct leakage of chyle through a lymphoperitoneal fistula associated with abnormal retroperitoneal lymphatic vessel; ② exudation of chyle through the walls of the retroperitoneal lymphatic without a visible fistula; ③ exudation or leakage of chyle after the rupture of dilated lymphatic of the bowel wall and mesentery caused by obstruction of the lymphatic vessel at the base of the mesentery, cisterna chyli, or thoracic duct [52].

Different incidences of postoperative chylous ascites have been analyzed in many surgeries including post-chemotherapy laparoscopic retroperitoneal lymph nodes dissection testicular cancer (23 of 329 patients, 7%) [63], or for stage IIB nonseminomatous testicular cancer (5 of 24 patients, 20.8%) [64] high incidence probably due to lymphatic metastases; surgery for abdominal neuroblastoma (32 of 160 patients, 20%) [65]; surgery for colorectal cancer (48 of 779 patients, 6%) [66]; retroperitoneal lymphadenectomy (24 of 1258 patients, 2%) [58]; laparoscopic donor nephrectomy (10 of 4636 patients, 2%), open donor nephrectomy (2 of 3047 patients, 0.6%) [61], laparoscopic nephrectomies (9 of 1159 patients, 0.77%) [67]; gynecological surgery with pelvic or/and para-aortic lymph node dissection (7 of 4119 patients, 0.17 %) [23]; and pancreatic resection (49 of 1921 patients 2.6%) [24].

Right colectomy has a significantly higher incidence rate of chyle leakage (9.6%) than left colectomy (2.6%) and anterior resection (2.8%). The reason may be the abundant lymphatic tributaries posterior to the abdominal aorta are close proximity to the cisterna chyli [24]. Resection of inflammatory aortic aneurysm, especially emergency surgery for a ruptured abdominal aortic aneurysm has a particularly high risk of chylous complications for the extensive and difficult dissection during the surgery. What's more, abdominal aortic surgery is said to be the most common etiology of postoperative chylous ascites, and causes 81% of all chylous complications due to the surgical injury of the retroperitoneal lymphatic glands or cisterna chyli [59]. Lymphatic metastases, number of lymph nodes removed and damage of lymphatic channels may increase the incidence of lymphatic leakage [64, 65]. This view needs more supports of clinical data. Open donor nephrectomy carries a lower incidence of chylous ascites than laparoscopic donor nephrectomy. However the reason is unclear, maybe for the easily suture ligation or clip [61]. Laparoscopic procedures seem to have a higher risk of unrecognized lymphatic injury. And the author suggests surgeons to coagulate the lymphatic channels adequately, even if there is no lymphatic leakage found

[31, 61]. However, some other people reported a lower incidence of chylous ascites with laparoscopic than laparotomy surgeries [16, 68]. Many relevant factors have been reported to chylous ascites, such as older age, female sex, preoperative chemotherapy, concomitant vascular resection, and low preoperative albumin, tumors fed by the superior mesenteric artery, increased intraoperative blood loss, and early enteral feeding, and we need detailed big clinical data to analyze the high risk factors [69].

## Chyloretroperitoneum

Chyloretroperitoneum is the chyle accumulating in a restricted limited space, retroperitoneal lacuna and not in the peritoneal cavity as chylous ascites [30]. There are few articles in PubMed not only because of the rare incidence [31], but also for the misdiagnosis as chylous ascites.

Chyloretroperitoneum has a special interest in urological surgeries [59], such as retroperitoneal lymph nodes dissection (RPLND) for testicular cancer, radical nephrectomy, donor nephrectomy and so on [31]. Anterior spinal surgery with or without diaphragm splitting is another relevant surgery to chyloretroperitoneum. The surgery below L1 level without diaphragm splitting is prone to injure the cisterna chyli or their tributaries [12]. Chylothorax may occur secondary to postoperative chyloretroperitoneum [12, 70].

## Chylothorax

Postoperative chylothorax is the accumulation of chyle in the pleural space due to the leakage of the thoracic duct or its branches. It is a rare but well-known lymphatic complication during the thoracic procedures [32].

Chylothorax occurs after many surgeries such as esophagectomy [25, 71, 72], pediatric congenital heart surgery [9, 73, 74] and pulmonary procedure [75, 76]. It can be detected within 3 days due to the beginning of oral intake food on POD 1 in most patients. But a rare late-onset chylothorax occurs 40 days after a right middle lobectomy [32].

Different surgery procedures usually have different incidences of chylothorax, such as esophagectomy 2.1% [25] – 2.5% [77], thoracoscopic esophagectomy 1.1% [78], pediatric congenital heart surgery (0.6% to 2%) [9], and pulmonary resection (1.4% to 4%) [26, 32, 79]. Miao et al. [77] reported a high BMI associated with decreased incidence of chylothorax following esophagectomy. What is more, the incidence of postoperative chylothorax of left-sided mediastinal lymph node dissection (MLND) is less than that on the right side [32]. And patients with pathologic N2 disease, which was defined as pathologically confirmed metastatic cancer in an N2 lymph nodes, had a higher incidence rate after robotic resection [26].

## Chylorrhea

Chylorrhea is a special form of lymphatic leakage [27, 29]. Compared with lymphorrhea, the only difference is the chyle exudation not lymph fluid. There are very few articles regarding chylorrhea due to confused classification with other types of lymphatic leakage. This is mixed up with lymphorrhea and chylous ascites, usually.

## Lymph leakage and chylous leakage

Even when we have defined most of the kinds of postoperative lymphatic leakage, there are still some types which can't be classified. For example, the lymphatic fluid drains from the drainage tube after the thyroid surgery with no lymphocele or lymphorrhea found. As one kind of lymphatic leakage, it can also be called chylous leakage with chyle fluid drainage or lymph leakage with only lymph fluid [10, 31, 80, 81].

Laparoscopic procedures seem to have a higher risk of unrecognized lymphatic injury since lymphatic leakage might be overlooked by CO<sub>2</sub> pressure [31]. Monopolar, bipolar or ultrasonic coagulation in laparoscopic surgery will destroy the lymphatic tracts [10]. 23 of 381 (0.6%) patients with malignant pancreatic tumors undergoing pancreaticoduodenectomy get the chylous leakage at POD 1 – 2 days after taking food. And the incidence is unrelated to gender, age and tumor pathological pattern but significantly associated with lymphatic metastasis [82].

## Complications of lymphatic leakage

Loss of fluid, triglyceride, lymphocyte and immunoglobulin [24, 50, 66], from the leakage of lymphatic vessels may lead to dehydration, nutritional deficiency [57, 61] and immunologic dysfunction [9, 59]. Pain and prolonged hospital stay (about 12.4 to 20.4 days) are the most common influence of lymphatic leakage [49]. At the same time, it will also will increase the infection rate [22, 38, 54] even with the negative microbiological test. Compression of vital structures may often happen in chylous ascites, lymphocele and chylothorax [22]. The others are less mentioned or with no clinical symptom, such as dehydration, nutritional deficiency, hypoalbuminemia, immunologic dysfunction or pyemia [22, 83]. Theoretically, all of these complications can occur for a long time and a large loss of lymphatic fluid. A rare complication of postoperative chylous ascites is a skin rash which rapidly progresses to widespread itchy erythema. And it almost regresses after a pigtail drainage tube is placed and approximately 3.5 Liter of odorless yellow-white fluid drained off [10].

## Diagnosis

Clinical symptoms include abdominal fullness, dyspnea, lasting pain, nausea and vomiting, malnutrition

and hypoproteinemia [84]. Before diagnosis of lymphatic leakage, we need first rule out of other post-operation complications, such as malignant ascites, hemoperitoneum, urine ascites due to injury of bladder, malignant pleural effusion, inflammatory exudation in body cavities, purulent exudate and so forth [68]. Collection and biochemical analysis of drainage is necessary. Oral intake related drainage increasing should catch your attention of lymphatic leakage. Physical signs of lymphatic leakage contain the clear or milky fluid exudate on the wound, swelling under the wound or ascites [12]. The adjuvant examinations include oral contrast test, computerized tomography (CT), lymphangiography, lymphoscintigraphy, laboratory examination and diagnosis by paracentesis. All this can be chosen to make an exact diagnosis.

## Oral contrast test (a fat-containing test meal)

Lymphatic flow will be less than 1 ml/min during pre-operative fasting time, but it may return to more than 200 ml/min after normal diet post-operation [11, 12]. Increasing rapidly from fasting to oral intake and/or turning clear to milky drainage fluid are the evidences of lymphatic leakage, especially the leakage of gastrointestinal tract [14]. High fat diet, an extensive amount of double cream [25, 85], is used to detect the leakage of lymphatic channels [38, 86]. That can be called "chylous lymphangiographic effect" [86]. However, another study holds the view that high fat diet only shows the diffusion of lymph leakage [57], but it's difficult to exactly point out the leakage. Sudan black in a concentrated fatty meal can facilitate the identification of leakage sites [57]. Diet contrasts combining with imaging studies are also used to locate the site of leakage such as <sup>13</sup>Carbon-palmitic acid and <sup>123</sup>Iodine pentadecanoic acid [59].

## Diagnostic paracentesis (US/CT/MR-guided) and laboratory examination

CT, ultrasonography (US) or magnetic resonance(MR) [53, 87] used in the diagnosis of lymphatic leakage, especially lymphocele and chylous ascites [57] can show us the hydrops [88], the cyst of body cavity [31] and location the leakage [89] particularly when there is suspicion of thoracic duct injury [85]. US- or CT- or MR- guided paracentesis and following by laboratory examination are widely used in diagnosis. Lab analysis findings include ① milky white or clear color, odorless, alkaline sterile fluid [9]; ②triglyceride-rich [90]( above 200 mg/dl [38, 91] or 2 to 8-fold of plasma [59, 61]); ③ high lymphocytes and proteins [9, 91]; ④ small amounts of cholesterol [12, 58, 91] and so on.

## Lymphangiography

Injection of ethiodized oil [59, 92, 93], patent blue V dye [94], isosulfan blue [95], indocyanine green (ICG)

[13, 50] into lymphatic vessels on the dorsum of the foot can make a real-time visualization of the lymph flow and identify the broken lymphatic vessels under direct vision. Bipedal lymphangiography can both be used in diagnosis and therapy to close the leakage [14, 96]. The reason may be that the inflammatory reaction caused by the contrast leads to the fibrosis and obliteration of leakage. Lymphangiography with thoracic duct embolization is also a well-described technique of refractory thoracic lymphatic leaks for diagnosis and treatment [97].

Several complications have been described of lymphangiography, including the tissue necrosis, fat embolism and hypersensitivity relating to the volume and type of contrast agents [85]. However, since it is difficult to treat at the meantime even on direct vision of lipiodol leakage, lymphangiography is not appropriate in dealing with lymphocele [36]. What's more, other side effects such as painful, tedious, poor reproducibility and some other negative results, increase the limitation of extensive use of lymphangiography in some fields [61].

## Lymphoscintigraphy

Lymphoscintigraphy was first introduced using <sup>198</sup>Au-colloid in 1953, which was then replaced by <sup>99m</sup>Tcnetium-colloid because of its high absorbed radiation at the injection site [98]. This technique is a nuclear medicine examination whereby a radiotracer is injected into the lymphatic system via the feet commonly. And then the images are obtained to monitor the flow of lymph to assess the rate of tracer transport, the number, size, distribution of lymph and identify any defects in the lymphatic vessels [8]. Lymphoscintigraphy can also show the collateral, fistula or lymph reflux [98] or reveal abnormal lymphatic stasis at the diaphragmatic level [8, 57]. And it is helpful in showing the lymphatic way that fills and maintains the lymphocele [44]. However, it's the same as lymphangiography, no obvious lymphatic leakage point revealed by lymphoscintigraphy was also reported [13].

## Treatment

Lymphatic leakage is a rare postoperative complication with controversial therapeutic methods. Many scholars devote themselves to finding the best way of treatment. However, so far, there is still no treatment guideline [58]. The following views are prone to convince us the basic principles of treatment. Firstly, before the exact method is taken, an assessment of an individual patient should be performed on consideration of prolonged hospital stay, patient's tolerance, compliance to trying fasting protocols, evidence of impairing health status or wound infection and so on. Secondly, treatments should be based on a step-up approach from conservative treatment for several weeks up to 2 months to surgical intervention

[38, 58]. 66% to 77% of patients can be successfully treated by conservative methods [9, 22, 59, 63]. Two articles describe a successful conservative treatment to all of their 48 and 23 patients [24, 82], respectively. Shao et al. also emphasized that lymphatic leakage is a self-limiting complication, which may heal within 2–3 weeks without further intervention. And lymphatic fluid can be absorbed by the peritoneum [99]. Conservative therapy including ① diet control (high protein, low fat, medium-chain triglyceride diet), the fasting and total parenteral nutrition; ② application of drugs (somatostatin analogue, vasoconstrictor pancreatic lipase inhibitor, diuretics, traditional Chinese herb medicine [6, 83]); ③ paracentesis and sclerotherapy [22], pressure dressing.

On the contrary, some authors think surgical intervention should be performed first for lymphatic leakage, since early ligation or suture of the leakage site is helpful to avoid metabolic complications and shorten hospitalization days [100]. If drainage volume is greater than 1000 – 1500 ml/day for more than 5 days during conservative treatment, surgical interventions should also be considered [12, 82]. The refractory leakage prompts a more aggressive approach as surgical repair including: ① peritoneovenous shunt; ② direct lymphostasis by suture ligation of the disrupted lymphatic channel; ③ surgery combining with fibrin glue [59].

## Medium-chain triglyceride (MCT)

MCT should be considered first when treating the lymphatic leakage. 50% to 90% lymph fluid of cisterna chyli and thoracic duct come from the intestine and liver [11]. Long-chain fatty acids will undergo a second esterification and then enter the lymphatic system as chylomicrons, while medium-chain fatty acids pass directly into the portal system and couple to albumin [9]. Low fat elementary diets are absorbed directly into the portal venous system and bypass the lymph vessels [6, 8, 101]. These treatments lead an especially MCT diet for decreasing the bowel absorption of fat. It is the basic theory of lymphatic leakage treatment [38, 62, 83, 89]. Leibovitch et al. suggest us that MCT diet should be tried before total parenteral nutrition [59]. Some people hold the view that a medium-chain triglyceride diet is more efficacious to chylous leakage than to lymph leakage due to the high cholesterol content in chylous fluid [34]. However, Frey et al. show the improved lymphatic ascites after using MCT [8].

## Total parenteral nutrition (TPN)

TPN has been applied in most of the cases to correct the nutritional consuming and offset metabolic impairment. TPN allows bowel rest and decreases the production of lymph. In the same time, it supplies proper proteins, vitamins and electrolytes to promote protein synthesis,

enhance plasma colloid osmotic pressure, and increase peritoneal effusion absorption [82]. It can be used alone or combined with other treatments [38]. The combination of TPN with somatostatin shows a significant effect in lymphatic leakage [61, 102]. Pabst et al. suggested that total parenteral nutrition should be applied immediately after the diagnosis of chylous ascites [59]. As for side-effect, TPN is not always effective [102] and it may bring several complications such as infection, thrombosis, cholestasis or mucosal integrity disorder with a very low incidence [9]. Seow et al. [6] described a patient who developed a parenteral nutrition line sepsis. However, Milonakis et al. [9] found no case meeting such problems in their 18 patients with chylothorax. What's more, after 2 – 6 weeks of TPN, 60% – 100% of cases are resolved.

### Somatostatin

Since the availability of somatostatin was emphasized in dealing with post-operative lymphorrhea in 1990 [31], it has been rapidly used in many cases. Somatostatin, a peptide hormone consisting of 14 to 28 amino acids, is highly effective in patients with high output lymphatic leakage [5, 58]. The mechanism is not clear. Some researchers think that it may reduce lymphatic production and concentrate the lymphatic vessels directly [58]. The receptors of somatostatin may distribute in various regions, including the pancreas, vascular tissue and gastrointestinal tract [18, 31, 58], even the smooth muscle cells of thoracic duct [58]. Therefore, it is speculated that somatostatin might induce the contraction of smooth muscle cells in blood vessels [58], and inhibit secretion and absorption of gastric, pancreatic and intestinal systems [9, 58]. And it may decrease lymphatic and splanchnic blood flow and decrease the hepatic venous pressure gradient. There might also be a direct action on lymphatic vessels [18]. Somatostatin is administered to patients with no response to the primary therapy such as MCT or TPN.

Octreotide, as one of the somatostatin analog, has a much longer half-life. It is widely used in the treatment of lymphatic leakage and has shown to be highly effective [70] in controlling lymphatic flow [5, 58]. A typically drastic decreasing in the output of the lymphatic leakage [102] occurs after 24 to 72 hours with the application of octreotide [58, 59, 103].

Two retrospective studies shown a success rate of 87% – 90% in the use of octreotide as an adjunct to conservative managements for chylothorax [31]. On the contrary, some authors doubt the effectiveness of somatostatin [61], since only two of six patients showed response to somatostatin [9].

### Negative pressure wound therapy (NPWT)

Lymphorrhea after vascular surgery, such as femoral endarterectomy, aortobifemoral bypass, inguinal

lymph nodes dissection need vacuum-sealing drainage (NPWT) [38, 104]. According to an animal test, NPWT can increase the granulation tissue in the wound by  $103.4\% \pm 35.3\%$  [35]. NPWT is supposed to promote wound healing by increasing blood flow, removing the wound inhibiting factors and decreasing the bacterial count [35]. Many authors describe the successful use of NPWT for 11 to 19 days after the femoral arteriotomy and inguinal lymph nodes dissection [105, 106]. On the contrary, some authors declare that it is unnecessary for the routine use of vacuum drainage in groin wounds [54]. And vacuum drainage is uncomfortable with no distinct advantage in preventing its complications.

### Drainage and sclerosing agents

Drainage can relieve symptoms by decreasing the accumulation of lymphatic fluid. It is frequently applied in most of lymphatic complications, such as lymph ascites, lymphocele, chylous ascites, and chylothorax [8, 16, 23, 26]. The volume of drainage is also an important index to evaluate the condition and to make the next therapeutic protocol of the patient. Percutaneous drainage is a safe method to deal with lymphatic leakage, especially lymphocele but with a high recurrence rate (up to 50%) [17, 43]. Combining with percutaneous drainage with a sclerosing agent, including doxycycline, tetracycline, bleomycin, OK-432, povidone-iodine, lipiodol and ethanol, can significantly decrease the recurrence rate [78, 96, 107]. The success rate of sclerosing treatment in the literature is 88% – 100% [60, 88]. Their standard of success is ① the recovery of clinical signs and symptoms; ② the maximal drainage less than 10 ml/day; ③ imaging evidence of lymphocele disappearance [88]. Pleurodesis dealing with the chylothorax by injection a mixture of 10 Klinische Einheit unit of OK-432 through a chest tube is effective for 13/15 of patients who have been treated by conservative treatment for 3 days with more than 300 ml/day drainage [76].

Another mentioned conservative treatment is traditional Chinese herb medicine (TCHM) reported by Xiu et al. [83]. It is an effective way to cure lymphatic leakage, with a marked decrease for 1 day after the use of TCHM to all their 6 patients. And their patients completely recover in 4 to 8 days. But we need more data to support the opinion on the usefulness of TCHM.

In short, after appropriate treatment most of the postoperative lymphatic leakage can be cured [61].

### Surgery

Peritoneovenous shunt [100] and operation under direct vision with or without the use of fibrin glue [91] is the most common surgical treatments to lymphatic leakage. Most of operations are taken following the failure of conservative treatment [60]. The surgery is particularly



recommended when ① leakage sustains for more than 2 weeks; ② drainage volume reaches more than 1 Liter, even after 1 week; ③ the patient starts to experience metabolic complications [83].

Lymphangiography and concentration of high fat diet intake are often used to locate the leakage. Once it is detected, ligature, suture and cure it [22, 89, 94]. If the leakage cannot be identified, fibrin glue is widely used [10, 57, 108–110] such as BioGlue [111], Floseal Hemostatic Matrix topical [94] and so on to cure all potential leakages during surgeries. Peritoneovenous shunts are another way to treat the refractory lymphatic leakage [83, 112]. Since laparoscopic surgeries seem to have a high incidence of lymphatic leakage, it is necessary to coagulate the lymphatic channels adequately as a preventive measure, even if lymphatic leakage is not found [10, 31, 57].

## MATERIALS AND METHODS

### Objective

After searching in PubMed about lymphatic leakage using the words “postoperative” plus “different types of lymphatic leakage” as the subject heading, we couldn’t find any article regarding the kinds of iatrogenic lymphatic complications, hence reviews and many diagnoses of lymphatic complications are found confusing due to different definition. The absence of exact definition of postoperative lymphatic leakage makes it difficult to do further analysis and causes more confusion. Thus, this review reveals lymphatic circulation in general, classification and definition of the most of lymphatic leakages, and summarizes the complications, diagnosis and treatment methods. This will provide you an all-sided view of postoperative lymphatic leakage.

## CONCLUSIONS

Even though only 112 closely related articles are referenced, those are enough to show the all-sided postoperative lymphatic leakage, we concluded that the complications, diagnoses, and treatments to provide an all-round view of postoperative lymphatic leakage. The exact definition of different types of postoperative lymphatic leakage benefits us in understanding comprehensively about it and improves our ability to analyze it. Varying incidence and high risk factors will remind us in the prevention of lymphatic leakage.

## Abbreviations

ILND, inguinal lymph node dissection; BMI, body mass index; RPLND, retroperitoneal lymph node dissection; POD, post-operation day; MLND, mediastinal lymph node dissection; CT, Computerized tomography;

US, ultrasonography; ICG, indocyanine green; MCT, medium-chain triglyceride; TPN, total parenteral nutrition; NPWT, negative pressure wound therapy; TCHM, traditional Chinese herb medicine.

## Authors’ contributions

SL, QW and WZ participated in the data collection, analysis, and writing of the manuscript. LH, QW, JZ, JD and CS participated in the data collection. NB and DQ participated in the writing of the manuscript. QS contributed to the project conception. QL contributed to the project conception, study design, data collection, analysis, and writing of the manuscript. All authors read and approved the final manuscript.

## CONFLICTS OF INTEREST

The authors declare that they have no conflicts of interest with the contents of this article.

## GRANT SUPPORT

This study was partly funded by grant of National Natural Science Foundation of China (81472823), Fundamental Research Funds for Xi’an Jiaotong University (xjj2015093), and the Clinical Research Award of the First Affiliated Hospital of Xi’an Jiaotong University, China (XJTU1AH2014-007).

## REFERENCES

1. Mallick A, Bodenham AR. Disorders of the lymph circulation: their relevance to anaesthesia and intensive care. *British journal of anaesthesia*. 2003; 91:265–272.
2. Langford RJ, Daudia AT, Malins TJ. A morphological study of the thoracic duct at the jugulo-subclavian junction. *Journal of crano-maxillo-facial surgery*. 1999; 27:100–104.
3. Valenzuela-Rendon J, Manning RD Jr. Chronic transvascular fluid flux and lymph flow during volume-loading hypertension. *The American journal of physiology*. 1990; 258:H1524–1533.
4. Liu M-E, Branstetter BFT, Whetstone J, Escott EJ. Normal CT appearance of the distal thoracic duct. *American journal of roentgenology*. 2006; 187:1615–1620.
5. Touska P, Constantinides VA, Palazzo FF. A rare complication: lymphocele following a re-operative right thyroid lobectomy for multinodular goitre. *British Medical Journal case reports*. 2012; 2012.
6. Seow C, Murray L, McKee RF. Surgical pathology is a predictor of outcome in post-operative lymph leakage. *International journal of surgery (London, England)*. 2010; 8:636–638.
7. Yamada T, Jin Y, Hasuo K, Maezawa Y, Kumazu Y, Rino Y, Masuda M. Chylorrhea following laparoscopy assisted distal gastrectomy with D1+ dissection for early gastric

- cancer: A case report. *International journal of surgery case reports*. 2013; 4:1173–1175.
8. Frey MK, Ward NM, Caputo TA, Taylor J, Worley MJ Jr, Slomovitz BM. Lymphatic ascites following pelvic and paraaortic lymphadenectomy procedures for gynecologic malignancies. *Gynecologic Oncology*. 2012; 125:48–53.
  9. Milonakis M, Chatzis AC, Giannopoulos NM, Contrafouris C, Bobos D, Kirvassilis GV, Sarris GE. Etiology and management of chylothorax following pediatric heart surgery. *Journal of cardiac surgery*. 2009; 24:369–373.
  10. Nishizawa K, Ito N, Yamamoto S, Kamoto T, Ogawa O. Successful laparoscopic management of chylous ascites following laparoscopic radical nephrectomy. *International journal of urology*. 2006; 13:619–621.
  11. Baniel J, Foster RS, Rowland RG, Bihrl R, Donohue JP. Management of chylous ascites after retroperitoneal lymph-node dissection for testicular cancer. *Journal of Urology*. 1993; 150:1422–1424.
  12. Su IC, Chen C-M. Spontaneous healing of retroperitoneal chylous leakage following anterior lumbar spinal surgery: a case report and literature review. *European spine journal*. 2007; 16:332–337.
  13. Unno N, Yamamoto N, Suzuki M, Tanaka H, Mano Y, Sano M, Saito T, Sugisawa R, Konno H. Intraoperative lymph mapping with preoperative vein mapping to prevent postoperative lymphorrhea following paramalleolar bypass surgery in patients with critical limb ischemia. *Surgery today*. 2014; 44:436–442.
  14. Landmann E, Rau W, Vollerthun M, Gortner L, Wudy SA. Nonchylous lymphatic ascites after appendectomy. *The Journal of pediatrics*. 2006; 149:425.
  15. Micha JP, Mendivil AA, Cupp JS, Goldstein BH. Recurrent lymphatic ascites in a patient cured of cervical carcinoma. *Gynecologic oncology case reports*. 2012; 2:105–106.
  16. Ghezzi F, Uccella S, Cromi A, Bogani G, Robba C, Serati M, Bolis P. Lymphoceles, lymphorrhea, and lymphedema after laparoscopic and open endometrial cancer staging. *Annals of surgical oncology*. 2012; 19:259–267.
  17. Karcaaltincaba M, Akhan O. Radiologic imaging and percutaneous treatment of pelvic lymphocele. *European journal of radiology*. 2005; 55:340–354.
  18. Capocasale E, Busi N, Valle RD, Mazzoni MP, Bignardi L, Maggiore U, Buzio C, Sianesi M. Octreotide in the treatment of lymphorrhea after renal transplantation: a preliminary experience. *Transplantation proceedings*. 2006; 38:1047–1048.
  19. Lausten GS, Engell HC. Postoperative complications in abdominal vascular surgery. *Acta chirurgica Scandinavica*. 1984; 150:457–461.
  20. Campisi CC, Boccardo F, Piazza C, Campisi C. Evolution of chylous fistula management after neck dissection. *Current opinion in otolaryngology & head and neck surgery*. 2013; 21:150–156.
  21. Kadota H, Kakiuchi Y, Yoshida T. Management of chylous fistula after neck dissection using negative-pressure wound therapy: A preliminary report. *The Laryngoscope*. 2012; 122:997–999.
  22. Lorenz K, Abuazab M, Sekulla C, Nguyen-Thanh P, Brauckhoff M, Dralle H. Management of lymph fistulas in thyroid surgery. *Langenbeck's archives of surgery/Deutsche Gesellschaft für Chirurgie*. 2010; 395:911–917.
  23. Shibuya Y, Asano K, Hayasaka A, Shima T, Akagi K, Ozawa N, Wada Y. A novel therapeutic strategy for chylous ascites after gynecological cancer surgery: a continuous low-pressure drainage system. *Archives of gynecology and obstetrics*. 2013; 287:1005–1008.
  24. Pan W, Yang C, Cai SY, Chen ZM, Cheng NS, Li FY, Xiong XZ. Incidence and risk factors of chylous ascites after pancreatic resection. *International journal of clinical and experimental medicine*. 2015; 8:4494–4500.
  25. Kranzfelder M, Gertler R, Hapfelmeier A, Friess H, Feith M. Chylothorax after esophagectomy for cancer: impact of the surgical approach and neoadjuvant treatment: systematic review and institutional analysis. *Surgical endoscopy*. 2013; 27:3530–3538.
  26. Bryant AS, Minnich DJ, Wei B, Cerfolio RJ. The incidence and management of postoperative chylothorax after pulmonary resection and thoracic mediastinal lymph node dissection. *The Annals of thoracic surgery*. 2014; 98:232–235; discussion 235–237.
  27. Gupta A, Dalela D, Vasudeva P, Sankhwar SN, Goel A. Scrotal chylorrhoea: images of uncommon scrotal fluid discharge. *Urology*. 2009; 73:1227–1228.
  28. Sales F, Trepo E, Brondello S, Lemaitre P, Bourgeois P. Chylorrhoea after axillary lymph node dissection. *European journal of surgical oncology*. 2007; 33:1042–1043.
  29. Matsutani T, Hirakata A, Nomura T, Hagiwara N, Matsuda A, Yoshida H, Uchida E. Transabdominal approach for chylorrhoea after esophagectomy by using fluorescence navigation with indocyanine green. *Case reports in surgery*. 2014; 2014:464017.
  30. Qi J, Gu ZQ, Chen F, Zhang L, Chen JH. Management of postoperative chyloretroperitoneum in adults. *Singapore medical journal*. 2009; 50:e338–341.
  31. Negoro H, Oka H, Kawakita M. Two cases of chyloretroperitoneum following retroperitoneoscopic nephroureterectomy. *International journal of urology*. 2006; 13:487–489.
  32. Liu CY, Hsu PK, Huang CS, Sun YH, Wu YC, Hsu WH. Chylothorax complicating video-assisted thoracoscopic surgery for non-small cell lung cancer. *World journal of surgery*. 2014; 38:2875–2881.
  33. Vida VL, Padalino MA, Barzon E, Stellin G. Efficacy of fibrinogen/thrombin-coated equine collagen patch in controlling lymphatic leaks. *Journal of cardiac surgery*. 2012; 27:441–442.
  34. Krishnan CS, Grant PT, Robertson G, Hacker NF. Lymphatic ascites following lymphadenectomy for

- gynecological malignancy. *International journal of gynecological cancer*. 2001; 11:392–396.
35. Abai B, Zickler RW, Pappas PJ, Lal BK, Padberg FT Jr. Lymphorrhea responds to negative pressure wound therapy. *Journal of vascular surgery*. 2007; 45:610–613.
  36. Lee EW, Shin JH, Ko HK, Park J, Kim SH, Sung KB. Lymphangiography to treat postoperative lymphatic leakage: a technical review. *Korean journal of radiology*. 2014; 15:724–732.
  37. Lamblin G, Chauvy L, Rannou C, Mathevet P, Chabert P, Mellier G, Chene G. Does ultrasonic advanced energy reduce lymphocele incidence in laparoscopic para-aortic lymphadenectomy? *European journal of obstetrics, gynecology, and reproductive biology*. 2015; 185:53–58.
  38. Kim HY, Kim JW, Kim SH, Kim YT, Kim JH. An analysis of the risk factors and management of lymphocele after pelvic lymphadenectomy in patients with gynecologic malignancies. *Cancer research and treatment*. 2004; 36:377–383.
  39. Nghiem DD, Beckman I. Intraperitoneal catheter drainage of lymphocele: an outpatient procedure. *Transplant international*. 2005; 18:721–723.
  40. Tinelli A, Mynbaev OA, Tsin DA, Giorda G, Malvasi A, Guido M, Nezhat FR. Lymphocele prevention after pelvic laparoscopic lymphadenectomy by a collagen patch coated with human coagulation factors: a matched case-control study. *International journal of gynecological cancer*. 2013; 23:956–963.
  41. Metcalf KS, Peel KR. Lymphocele. *Annals of the Royal College of Surgeons of England*. 1993; 75:387–392.
  42. Hamza A, Fischer K, Koch E, Wicht A, Zacharias M, Loertzer H, Fornara P. Diagnostics and therapy of lymphoceles after kidney transplantation. *Transplantation proceedings*. 2006; 38:701–706.
  43. Nakamura Y, Fujisawa Y, Maruyama H, Furuta J, Kawachi Y, Otsuka F. Intraoperative mapping with isosulfan blue of lymphatic leakage during inguinal lymph node dissection (ILND) for skin cancer for the prevention of postoperative lymphocele. *Journal of surgical oncology*. 2011; 104:657–660.
  44. Francesco B, Corrado C, Giuseppe M, Emanuela B, Chiara B, Francesco P, Corradino C. Prevention of lymphatic injuries in surgery. *Microsurgery*. 2010; 30:261–265.
  45. Navarro-Rodriguez E, Gomez-Luque I, Diaz-Jimenez N, Rioja-Torres P, Bascunana-Estudillo G, Francisco Ruiz-Rabelo J, Ciria-Bru R, Alvarez-Benito M, Rufian-Pena S, Briceno-Delgado J. Effectiveness of an absorbable fibrin sealant patch to reduce lymphoceles formation after axillary lymphadenectomy for breast cancer: a matched-pair analysis. *American Journal of Surgery*. 2014; 208:824–830.
  46. Upadhyaya CD, Park P, La Marca F. Chyloretroperitoneum following anterior spinal deformity correction. Case report. *Journal of neurosurgery Spine*. 2007; 7:562–565.
  47. Suver DW, Perkins JA, Manning SC. Somatostatin treatment of massive lymphorrhea following excision of a lymphatic malformation. *International journal of pediatric otorhinolaryngology*. 2004; 68:845–850.
  48. Ilzecki M, Zubilewicz T, Przywara S, Terlecki P. The evaluation of the effectiveness of Tachosil in the treatment of lymphorrhea of the postoperative wound in the selected group of patients, after vascular reconstructive surgeries—preliminary report. *Polski przegląd chirurgiczny*. 2013; 85:687–692.
  49. Mayer R, Sminia P, McBride WH, Stranzl H, Prettenhofer U, Fruhwirth J, Poschauko J. Lymphatic fistulas: obliteration by low-dose radiotherapy. *Strahlentherapie und Onkologie: Organ der Deutschen Röntgengesellschaft [et al]*. 2005; 181:660–664.
  50. Hara H, Mihara M, Hayashi A, Kanemaru M, Todokoro T, Yamamoto T, Iida T, Hino R, Koshima I. Therapeutic strategy for lower limb lymphedema and lymphatic fistula after resection of a malignant tumor in the hip joint region: a case report. *Microsurgery*. 2014; 34:224–228.
  51. Cnotliwy M, Gutowski P, Petriczko W, Turowski R. Doxycycline treatment of groin lymphatic fistulae following arterial reconstruction procedures. *European journal of vascular and endovascular surgery*. 2001; 21:469–470.
  52. Sy ED, Lin CH, Shan YS, Wu MH. Chyloperitoneum: a postoperative complication after repair of tracheoesophageal fistula. *Journal of pediatric surgery*. 2001; 36:E1.
  53. Giovannini I, Giulianti F, Chiarla C, Giordano M, Ardito F, Vellone M, Sarno G, Nuzzo G. External lymphatic fistula after intra-abdominal lymphadenectomy for cancer. Treatment with total parenteral nutrition and somatostatin. *Nutrition (Burbank, Los Angeles County, Calif)*. 2008; 24:1220–1223.
  54. Dunlop MG, Fox JN, Stonebridge PA, Clason AE, Ruckley CV. Vacuum drainage of groin wounds after vascular surgery: a controlled trial. *The British journal of surgery*. 1990; 77:562–563.
  55. Hackert T, Werner J, Loos M, Buchler MW, Weitz J. Successful doxycycline treatment of lymphatic fistulas: report of five cases and review of the literature. *Langenbeck's archives of surgery*. 2006; 391:435–438.
  56. Kaas R, Rustman LD, Zoetmulder FA. Chylous ascites after oncological abdominal surgery: incidence and treatment. *European journal of surgical oncology*. 2001; 27:187–189.
  57. Zeidan S, Delarue A, Rome A, Roquelaure B. Fibrin glue application in the management of refractory chylous ascites in children. *Journal of pediatric gastroenterology and nutrition*. 2008; 46:478–481.
  58. Kim EA, Park H, Jeong SG, Lee C, Lee JM, Park CT. Octreotide therapy for the management of refractory chylous ascites after a staging operation for endometrial adenocarcinoma. *The journal of obstetrics and gynaecology research*. 2014; 40:622–626.
  59. Leibovitch I, Mor Y, Golomb J, Ramon J. The diagnosis and management of postoperative chylous ascites. *The Journal of urology*. 2002; 167:449–457.
  60. Yang C, Zhang J, Wang S, Li Cc, Kong Xr, Zhao Z. Successful management of chylous ascites with total

parenteral nutrition and octreotide in children. *Nutricion hospitalaria*. 2013; 28:2124–2127.

61. Tiong HY, Goel RK, White WM, Goldfarb DA, Kaouk JH. Chylous ascites after laparoscopic donor nephrectomy. *Asian journal of endoscopic surgery*. 2015; 8:34–39.
62. Bartolini I, Bechi P. Chylous ascites after laparoscopic anterior resection of the rectum. *Surgery*. 2013; 153:875–876.
63. Evans JG, Spiess PE, Kamat AM, Wood CG, Hernandez M, Pettaway CA, Dinney CPN, Pisters LL. Chylous ascites after post-chemotherapy retroperitoneal lymph node dissection: Review of the M.D. Anderson experience. *Journal of Urology*. 2006; 176:1463–1467.
64. Janetschek G, Hobisch A, Hittmair A, Holzl L, Peschel R, Bartsch G. Laparoscopic retroperitoneal, lymphadenectomy after chemotherapy for stage IIB nonseminomatous testicular carcinoma. *Journal of Urology*. 1999; 161:477–481.
65. Qureshi SS, Rent EG, Bhagat M, Dsouza P, Kembhavi S, Vora T, Prasad M, Chinnaswamy G, Ramadwar M, Laskar S, Khanna N, Shah S, Talole S. Chyle leak following surgery for abdominal neuroblastoma. *Journal of Pediatric Surgery*. 2016; 51:1557–1560.
66. Giovannini I, Giuliante F, Chiarla C, Ardito F, Vellone M, Nuzzo G. Non-surgical management of a lymphatic fistula, after laparoscopic colorectal surgery, with total parenteral nutrition, octreotide, and somatostatin. *Nutrition*. 2005; 21:1065–1067.
67. Jairath A, Singh A, Ganpule A, Mishra S, Sabnis R, Desai M. Management Protocol for Chylous Ascites After Laparoscopic Nephrectomy. *Urology*. 2015; 86:521–528.
68. Perez-Medina T, Pereira A, San-Frutos L, Garcia-Espantaleon M, Chiverto Y, Engels V, Ronchas M, Troyano J. Lymphatic ascites after retroperitoneal lymphadenectomy in gynecologic cancer. *Surgical Oncology-Oxford*. 2015; 24:300–304.
69. Weniger M, D'Haese JG, Angele MK, Kleespies A, Werner J, Hartwig W. Treatment options for chylous ascites after major abdominal surgery: a systematic review. *American Journal of Surgery*. 2016; 211:206–213.
70. Bachmann A, Ruzsat R, Dickenmann M, Giannini O, Mayr M, Steiger J, Gasser TC, Sulser T. Chyloretroperitoneum with secondary chylothorax after retroperitoneoscopic donor nephrectomy. *Urology*. 2005; 66:881.
71. Yamamoto M, Miyata H, Yamasaki M, Maeda N, Miyazaki Y, Takahashi T, Kurokawa Y, Nakajima K, Takiguchi S, Mori M, Doki Y. Chylothorax after esophagectomy cured by intranodal lymphangiography: a case report. *Anticancer research*. 2015; 35:891–895.
72. Hoepfner J, Hopt UT. Transabdominal mass ligation of the thoracic duct for the prevention of chylothorax following en bloc oesophagectomy. *European journal of cardio-thoracic surgery*. 2013; 44:1134–1136.
73. Yeh J, Brown ER, Kellogg KA, Donohue JE, Yu S, Gaies MG, Fifer CG, Hirsch JC, Aiyagari R. Utility of a clinical practice guideline in treatment of chylothorax in the postoperative congenital heart patient. *The Annals of thoracic surgery*. 2013; 96:930–936.
74. Matsuo S, Takahashi G, Konishi A, Sai S. Management of refractory chylothorax after pediatric cardiovascular surgery. *Pediatric cardiology*. 2013; 34:1094–1099.
75. Mitas L, Horvath T, Sobotka M, Garajova B, Hanke I, Kala Z, Penka I, Ivicic J, Vomela J. Complications in patients undergoing pulmonary oncological surgery. *Rozhledy v chirurgii : mesicnik Ceskoslovenske chirurgicke spolecnosti*. 2010; 89:113–117.
76. Takuwa T, Yoshida J, Ono S, Hishida T, Nishimura M, Aokage K, Nagai K. Low-fat diet management strategy for chylothorax after pulmonary resection and lymph node dissection for primary lung cancer. *The Journal of thoracic and cardiovascular surgery*. 2013; 146:571–574.
77. Miao L, Chen H, Xiang J, Zhang Y. A high body mass index in esophageal cancer patients is not associated with adverse outcomes following esophagectomy. *Journal of Cancer Research and Clinical Oncology*. 2015; 141:941–950.
78. Tabata H, Ojima T, Nakamori M, Nakamura M, Katsuda M, Hayata K, Matsumura S, Kato T, Kitadani J, Takeuchi A, Iwahashi M, Yamaue H. Successful treatment of chylothorax after esophagectomy using octreotide and etilefrine. *Esophagus*. 2016; 13:306–310.
79. Uchida S, Suzuki K, Hattori A, Takamochi K, Oh S. Surgical intervention strategy for postoperative chylothorax after lung resection. *Surgery Today*. 2016; 46:197–202.
80. Lee YS, Nam K-H, Chung WY, Chang H-S, Park CS. Postoperative complications of thyroid cancer in a single center experience. *Journal of Korean medical science*. 2010; 25:541–545.
81. Cheng WM, Lin TP, Lin CC, Huang EYH, Chung HJ, Kuo JY, Huang WJS, Chang YH, Lin ATL, Chen KK. Standardized report for early complications of radical prostatectomy. *Journal of the Chinese Medical Association*. 2014; 77:234–241.
82. Ji W, Wang J, Song B, Zheng K, Ma H, Nadaf A, Shao Z, Jin G. Cause analysis and therapeutic methods of chylous leakage after pancreaticoduodenectomy. *Saudi medical journal*. 2014; 35:1396–1399.
83. Xiu L, Yan B, Qin Z, Liu X, Wu F, Wang X, Wei P. Chylous ascites treated by traditional Chinese herbal medicine: a case report and discussion. *Complementary therapies in medicine*. 2015; 23:63–67.
84. Galanopoulos G, Konstantopoulos T, Theodorou S, Tsoutsas I, Xanthopoulos D, Kaperonis E, Papavassiliou V. Chylous Ascites Following Open Abdominal Aortic Aneurysm Repair: An Unusual Complication. *Methodist DeBakey cardiovascular journal*. 2016; 12:119–121.
85. Lans TE, van Ramshorst GH, Hermans JJ, den Bakker MA, Tran TCK, Kazemier G. Perivascular epithelioid cell tumor of the retroperitoneum in a young woman resulting in an abdominal chyloma. *Journal of gastrointestinal surgery*. 2009; 13:389–392.

86. Chui CH. Mesenteric lymphatic ligation in the prevention of chylous fistulae in abdominal neuroblastoma surgery. *Pediatric surgery international*. 2014; 30:1009–1012.
87. Suzuki M, Morita S, Iizuka K. A case of idiopathic lymph leakage in the neck. *Auris, nasus, larynx*. 2010; 37:535–537.
88. Tasar M, Gulec B, Saglam M, Yavuz I, Bozlar U, Ugurel S. Posttransplant symptomatic lymphocele treatment with percutaneous drainage and ethanol sclerosis: long-term follow-up. *Clinical imaging*. 2005; 29:109–116.
89. Uchinami M, Morioka K, Doi K, Nakamura T, Yoshida M, Tanaka K. Retroperitoneal laparoscopic management of a lymphocele after abdominal aortic surgery: a case report. *Journal of vascular surgery*. 2005; 42:552–555.
90. Lim YC, Choi EC, Lee JS, Koo BS, Song MH, Shin HA. Is dissection of level IV absolutely necessary in elective lateral neck dissection for clinically N0 laryngeal carcinoma? *Oral oncology*. 2006; 42:102–107.
91. Haraguchi M, Kuroki T, Tsuneoka N, Furui J, Kanematsu T. Management of chylous leakage after axillary lymph node dissection in a patient undergoing breast surgery. *Breast (Edinburgh, Scotland)*. 2006; 15:677–679.
92. Hur S, Shin JH, Lee IJ, Min SK, Min SI, Ahn S, Kim J, Kim SY, Kim M, Lee M, Kim HC, Jae HJ, Chung JW, et al. Early Experience in the Management of Postoperative Lymphatic Leakage Using Lipiodol Lymphangiography and Adjunctive Glue Embolization. *Journal of Vascular and Interventional Radiology*. 2016; 27:1177–1186.
93. Matsumoto T, Yamagami T, Kato T, Hirota T, Yoshimatsu R, Masunami T, Nishimura T. The effectiveness of lymphangiography as a treatment method for various chyle leakages. *British Journal of Radiology*. 2009; 82:286–290.
94. Choong AMTL, Alagaratnam S, Floyd D, Al-Dubaisi M, Loh A. How to locate and treat lymph leaks using patent blue V dye and Floseal. *Annals of vascular surgery*. 2014; 28:495–497.
95. Maddox JS, Sabino JM, Buckingham EB, Munding GS, Zelken JA, Bluebond-Langner RO, Singh DP, Holton LH 3rd. Utility of indocyanine green fluorescence lymphography in identifying the source of persistent groin lymphorrhea. *Plastic and reconstructive surgery Global open*. 2014; 2:e210.
96. Gomez FM, Martinez-Rodrigo J, Marti-Bonmati L, Santos E, Forner I, Lloret M, Perez-Enguix D, Garcia-Marcos R. Transnodal lymphangiography in the diagnosis and treatment of genital lymphedema. *Cardiovascular and interventional radiology*. 2012; 35:1488–1491.
97. Ching KC, Santos E, McCluskey K, Jeyabalan G. CT-guided injection of N-butyl cyanoacrylate glue for treatment of chylous leak after aorto-mesenteric bypass. *Cardiovascular and interventional radiology*. 2014; 37:1103–1106.
98. Pui MH, Yueh TC. Lymphoscintigraphy in chyluria, chyloperitoneum and chylothorax. *Journal of Nuclear Medicine*. 1998; 39:1292–1296.
99. Shao P, Meng X, Li J, Lv Q, Zhang W, Xu Z, Yin C. Laparoscopic extended pelvic lymph node dissection during radical cystectomy: technique and clinical outcomes. *BJU international*. 2011; 108:124–128.
100. Liu Y, Pan C, Tang JY, Chen J, Zhou M, Ye QD. What is the result: chylous leakage following extensive radical surgery of neuroblastoma. *World journal of pediatrics*. 2012; 8:151–155.
101. Moro K, Koyama Y, Kosugi Si, Ishikawa T, Ichikawa H, Hanyu T, Miura K, Nagahashi M, Nakajima M, Tatsuda K, Tsuchida J, Toshikawa C, Ikarashi M, et al. Low fat-containing elemental formula is effective for postoperative recovery and potentially useful for preventing chyle leak during postoperative early enteral nutrition after esophagectomy. *Clinical Nutrition*. 2016; 35:1423–1428.
102. Van Gossom A, Stefanidis C, De Franquen P. Lack of effect of somatostatin and analogues in lymphorrhagia from ruptured thoracic duct. *Lancet*. 1992; 339:491–492.
103. Ismail NA, Gordon J, Dunning J. The use of octreotide in the treatment of chylothorax following cardiothoracic surgery. *Interactive cardiovascular and thoracic surgery*. 2015; 20:848–854.
104. Kang JL, Patel VI, Conrad MF, Lamuraglia GM, Chung TK, Cambria RP. Common femoral artery occlusive disease: contemporary results following surgical endarterectomy. *Journal of vascular surgery*. 2008; 48:872–877.
105. Ito H, Arao M, Ishigaki H, Shirai A, Yamasaka T, Hirai K. The use of negative pressure wound therapy to treat wound necrosis and groin lymphorrhea after inguinal lymph nodes dissection: a case report. *Nihon Hinyokika Gakkai zasshi The Japanese journal of urology*. 2012; 103:22–26.
106. Kai W, Minggang W, Liping Z, Xiaohong Z, Yanjun C, Du X. The role of continuous vacuum sealing drainage in the prevention of lymph leakage after inguinal lymph nodes dissection. *Chinese journal of plastic surgery*. 2014; 30:262–264.
107. Ohkura Y, Ueno M, Iizuka T, Haruta S, Tanaka T, Udagawa H. New Combined Medical Treatment With Etilefrine and Octreotide for Chylothorax After Esophagectomy A Case Report and Review of the Literature. *Medicine*. 2015; 94.
108. Lemmer JH, Zwischenberger JB, Bove EL, Dick M. Lymph leak from a femoral cutdown site in a neonate: repair with fibrin glue. *Journal of pediatric surgery*. 1987; 22:827–828.
109. Mustonen PK, Harma MA, Eskelinen MJ. The effect of fibrin sealant combined with fibrinolysis inhibitor on reducing the amount of lymphatic leakage after axillary evacuation in breast cancer. A prospective randomized clinical trial. *Scandinavian journal of surgery*. 2004; 93:209–212.
110. Ohtsuka T, Ninomiya M, Kobayashi J, Kaneko Y. VATS thoracic-duct division for aortic surgery-related chylous leakage. *European journal of cardio-thoracic surgery*. 2005; 27:153–155.

111. Passage J, Tam R, Windsor M, O'Brien M. Bioglue: a review of the use of this new surgical adhesive in thoracic surgery. *ANZ journal of surgery*. 2005; 75:315–318.
112. Steiner H, Leonhartsberger N, Stoehr B, Peschel R, Pichler R. Postchemotherapy laparoscopic retroperitoneal

lymph node dissection for low-volume, stage II, nonseminomatous germ cell tumor: first 100 patients. *European urology*. 2013; 63:1013–1017.
